# Supplementary material for: Structural, optical, and magnetic properties of Ag+, Mn+ and Ar+ ions implanted ZnO thin films: effect of implantation dose and stopping energy
Source: Royal Society of Chemistry journal article supplement (doi:10.1039/d2ra05430b), 2022-01-01
Supplement: d2ra05430b1.pdf [file d2ra05430b1.pdf]

**Structural, optical, and magnetic properties of Ar<sup>+</sup>, Mn<sup>+</sup> and Ag<sup>+</sup> ions implanted ZnO thin films: effect of implantation dose and stopping energy**

Weon Cheol Lim<sup>a,b</sup>, Jitendra Pal Singh<sup>c</sup>, Jonghan Song<sup>a</sup>, Tae-Yeon Seong<sup>b,\*</sup>, Keun Hwa Chae<sup>a,\*</sup>

<sup>a</sup> Advanced Analysis and Data Center, Korea Institute of Science and Technology, Seoul 02792, Republic of Korea.

<sup>b</sup> Department of Materials Science and Engineering, Korea University, Seoul 02841, Republic of Korea

<sup>c</sup> Department of Physics, Manav Rachna University, Faridabad 121004, India

Supplementary Information

### Section S1: Calculation of crystallite size “D” and lattice parameter “c”

The crystallite size “D” is estimated as follows

$$D = \frac{0.94\lambda}{\beta \cos\theta}$$

Where,  $\lambda$  is wavelength of radiation used.  $\beta$  is full width at half maximum for most intense peak,  $\theta$  is Bragg angle.

The lattice parameters,  $c$ , of these films were calculated using the relation,

$$\frac{1}{d^2} = \frac{4}{3} \left( \frac{h^2 + hk + k^2}{a^2} \right) + \frac{l^2}{c^2}$$

where  $(h,k,l)$  are the miller indices of a plane,  $d$  the interplanar spacing, and  $a$  and  $c$  are the lattice constants of unit cells. The lattice parameter,  $c$ , was derived from the (002) peak of the XRD patterns.

**Table S1: Parameters used for simulation of RBS spectra of implanted films.**

| Ions            | Dose<br>(ions/cm <sup>2</sup> ) | Thickness<br>(Å) | Composition ratio |   | M <sup>+</sup><br>(Ar/Mn/Ag) | Areal<br>density of<br>Zn<br>(×10 <sup>15</sup> /cm <sup>2</sup> ) |
|-----------------|---------------------------------|------------------|-------------------|---|------------------------------|--------------------------------------------------------------------|
|                 |                                 |                  | Zn                | O |                              |                                                                    |
| No              | Pristine                        | 1380             | 1                 | 1 |                              |                                                                    |
| Ar <sup>+</sup> | 1×10 <sup>13</sup>              | 1205             | 1                 | 1 | low                          | 4550                                                               |
|                 | 1×10 <sup>14</sup>              | 1164             | 1                 | 1 | low                          | 4389                                                               |
|                 | 1×10 <sup>15</sup>              | 1156             | 1                 | 1 | 0.01                         | 4360                                                               |
|                 | 2×10 <sup>16</sup>              | 1101             | 1                 | 1 | 0.04                         | 4144                                                               |
| Mn <sup>+</sup> | 1×10 <sup>13</sup>              | 1114             | 1                 | 1 | overlap                      | 4215                                                               |
|                 | 1×10 <sup>14</sup>              | 1151             | 1                 | 1 | overlap                      | 4361                                                               |
|                 | 1×10 <sup>15</sup>              | 1159             | 1                 | 1 | overlap                      | 4392                                                               |
|                 | 2×10 <sup>16</sup>              | 1106             | 1                 | 1 | overlap                      | 4185                                                               |
| Ag <sup>+</sup> | 1×10 <sup>13</sup>              | 1161             | 1                 | 1 | low                          | 4399                                                               |
|                 | 1×10 <sup>14</sup>              | 1172             | 1                 | 1 | low                          | 4444                                                               |
|                 | 1×10 <sup>15</sup>              | 1159             | 1                 | 1 | 0.001                        | 4389                                                               |
|                 | 2×10 <sup>16</sup>              | 1000             | 1                 | 1 | 0.002                        | 3776                                                               |

**Table S2: Main edge energy and spectral features in Zn *K*-edge NEXAFS spectra.**

| <b>Ions</b>           | <b>Dose<br/>(ions/cm<sup>2</sup>)</b> | <b>Main Edge Energy<br/>(eV)</b> | <b>a<sub>1</sub></b> | <b>b<sub>1</sub></b> | <b>c<sub>1</sub></b> |
|-----------------------|---------------------------------------|----------------------------------|----------------------|----------------------|----------------------|
| <b>Ar<sup>+</sup></b> | Pristine                              | 9659.8                           | 9667.8               | 9679.0               | 9713.8               |
|                       | 1×10 <sup>13</sup>                    | 9659.9                           | 9668.2               | 9679.7               | 9712.9               |
|                       | 1×10 <sup>14</sup>                    | 9659.8                           | 9667.8               | 9679.4               | 9713.0               |
|                       | 1×10 <sup>15</sup>                    | 9659.9                           | 9667.8               | 9679.4               | 9713.8               |
|                       | 2×10 <sup>16</sup>                    | 9659.8                           | 9668.2               | 9679.4               | 9713.8               |
| <b>Mn<sup>+</sup></b> | 1×10 <sup>13</sup>                    | 9660.0                           | 9667.8               | 9679.8               | 9713.8               |
|                       | 1×10 <sup>14</sup>                    | 9659.9                           | 9667.8               | 9679.8               | 9713.0               |
|                       | 1×10 <sup>15</sup>                    | 9659.9                           | 9667.8               | 9679.4               | 9713.0               |
|                       | 2×10 <sup>16</sup>                    | 9659.9                           | 9667.8               | 9679.8               | 9713.8               |
| <b>Ag<sup>+</sup></b> | 1×10 <sup>13</sup>                    | 9659.8                           | 9667.8               | 9679.4               | 9713.0               |
|                       | 1×10 <sup>14</sup>                    | 9659.8                           | 9667.8               | 9679.4               | 9713.0               |
|                       | 1×10 <sup>15</sup>                    | 9660.0                           | 9668.1               | 9679.8               | 9713.8               |
|                       | 2×10 <sup>16</sup>                    | 9659.8                           | 9667.8               | 9679.4               | 9713.8               |

**Table S3: Simulated parameters from EXAFS spectra for Ar<sup>+</sup> implanted ZnO films. N is coordination number, R is bonding length, and  $\sigma^2$  is Debye-Waller factor.**

| Path                  | Parameters                   | Pristine    | $1 \times 10^{13}$<br>(ions/cm <sup>2</sup> ) | $1 \times 10^{14}$<br>(ions/cm <sup>2</sup> ) | $1 \times 10^{15}$<br>(ions/cm <sup>2</sup> ) | $2 \times 10^{16}$<br>(ions/cm <sup>2</sup> ) |
|-----------------------|------------------------------|-------------|-----------------------------------------------|-----------------------------------------------|-----------------------------------------------|-----------------------------------------------|
| <b>Zn-O<br/>(I)</b>   | N                            | 4.2±0.9     | 3.9±0.4                                       | 4.0±0.5                                       | 3.9±0.4                                       | 3.8±0.4                                       |
|                       | R (Å)                        | 1.97±0.01   | 1.98±0.03                                     | 1.98±0.04                                     | 1.97±0.03                                     | 1.97±0.03                                     |
|                       | $\sigma^2$ (Å <sup>2</sup> ) | 0.006±0.004 | 0.004                                         | 0.005                                         | 0.004                                         | 0.004                                         |
| <b>Zn-Zn<br/>(I)</b>  | N                            | 4.9±1.5     | 5.4±1.1                                       | 5.6±1.3                                       | 5.2±1.1                                       | 4.9±1.1                                       |
|                       | R (Å)                        | 3.14±0.02   | 3.30±0.001                                    | 3.3±0.11                                      | 3.29±0.10                                     | 3.31±0.12                                     |
|                       | $\sigma^2$ (Å <sup>2</sup> ) | 0.001       | 0.001                                         | 0.001                                         | 0.001                                         | 0.001                                         |
| <b>Zn-Zn<br/>(II)</b> | N                            | 6.0±1.5     | 4.9±1.2                                       | 5.2±1.4                                       | 4.7±1.2                                       | 5.5±1.2                                       |
|                       | R (Å)                        | 3.29±0.02   | 3.15±0.005                                    | 3.15±0.004                                    | 3.15±0.003                                    | 3.16±0.01                                     |
|                       | $\sigma^2$ (Å <sup>2</sup> ) | 0.001       | 0.001                                         | 0.001                                         | 0.001                                         | 0.002                                         |
| <b>Zn-O<br/>(II)</b>  | N                            | 8.2±2.4     | 8.9±2.5                                       | 8.4±2.9                                       | 8.6±2.6                                       | 7.8±2.3                                       |
|                       | R (Å)                        | 3.78±0.03   | 3.79±0.05                                     | 3.79±0.05                                     | 3.78±0.04                                     | 3.79±0.05                                     |
|                       | $\sigma^2$ (Å <sup>2</sup> ) | 0.001       | 0.003                                         | 0.002                                         | 0.003                                         | 0.003                                         |
|                       | $\epsilon_0$ (eV)            | 5.2         | 6.0                                           | 6.0                                           | 6.0                                           | 6.0                                           |
|                       | <b>R-factor</b>              | 0.05        | 0.04                                          | 0.05                                          | 0.04                                          | 0.03                                          |

**Table S4: Simulated parameters from EXAFS spectra for Mn<sup>+</sup> implanted ZnO films.**

| Path                  | Parameters                   | Pristine    | $1 \times 10^{13}$<br>(ions/cm <sup>2</sup> ) | $1 \times 10^{14}$<br>(ions/cm <sup>2</sup> ) | $1 \times 10^{15}$<br>(ions/cm <sup>2</sup> ) | $2 \times 10^{16}$<br>(ions/cm <sup>2</sup> ) |
|-----------------------|------------------------------|-------------|-----------------------------------------------|-----------------------------------------------|-----------------------------------------------|-----------------------------------------------|
| <b>Zn-O<br/>(I)</b>   | N                            | 4.2±0.9     | 4.1±0.5                                       | 3.9±0.5                                       | 3.9±0.5                                       | 3.7±0.5                                       |
|                       | R (Å)                        | 1.97±0.01   | 1.98±0.04                                     | 1.98±0.04                                     | 1.98±0.04                                     | 1.99±0.04                                     |
|                       | $\sigma^2$ (Å <sup>2</sup> ) | 0.006±0.004 | 0.005                                         | 0.004                                         | 0.004                                         | 0.004                                         |
| <b>Zn-Zn<br/>(I)</b>  | N                            | 4.9±1.5     | 5.7±1.2                                       | 5.8±1.3                                       | 5.8±1.3                                       | 5.8±1.3                                       |
|                       | R (Å)                        | 3.14±0.02   | 3.31±0.011                                    | 3.3±0.11                                      | 3.31±0.12                                     | 3.2±0.12                                      |
|                       | $\sigma^2$ (Å <sup>2</sup> ) | 0.001       | 0.001                                         | 0.001                                         | 0.001                                         | 0.001                                         |
| <b>Zn-Zn<br/>(II)</b> | N                            | 6.0±1.5     | 5.7±1.4                                       | 5.7±1.4                                       | 5.6±1.3                                       | 5.4±1.3                                       |
|                       | R (Å)                        | 3.29±0.02   | 3.16±0.01                                     | 3.15±0.004                                    | 3.16±0.01                                     | 3.16±0.01                                     |
|                       | $\sigma^2$ (Å <sup>2</sup> ) | 0.001       | 0.002                                         | 0.002                                         | 0.001                                         | 0.002                                         |
| <b>Zn-O<br/>(II)</b>  | N                            | 8.2±2.4     | 8.5±2.5                                       | 7.7±2.5                                       | 8.4±2.7                                       | 8.4±2.9                                       |
|                       | R (Å)                        | 3.78±0.03   | 3.80±0.06                                     | 3.80±0.06                                     | 3.80±0.06                                     | 3.82±0.08                                     |
|                       | $\sigma^2$ (Å <sup>2</sup> ) | 0.001       | 0.002                                         | 0.001                                         | 0.003                                         | 0.003                                         |
| $\epsilon_0$ (eV)     |                              | 5.2         | 6.0                                           | 6.0                                           | 6.0                                           | 6.0                                           |
| <b>R-factor</b>       |                              | 0.05        | 0.04                                          | 0.05                                          | 0.05                                          | 0.05                                          |

**Table S5: Simulated parameters from EXAFS spectra for Ag<sup>+</sup> implanted ZnO films.**

| <b>Path</b>               | <b>Parameters</b>                | <b>Pristine</b> | <b>1×10<sup>13</sup><br/>(ions/cm<sup>2</sup>)</b> | <b>1×10<sup>14</sup><br/>(ions/cm<sup>2</sup>)</b> | <b>1×10<sup>15</sup><br/>(ions/cm<sup>2</sup>)</b> | <b>2×10<sup>16</sup><br/>(ions/cm<sup>2</sup>)</b> |
|---------------------------|----------------------------------|-----------------|----------------------------------------------------|----------------------------------------------------|----------------------------------------------------|----------------------------------------------------|
| <b>Zn-O<br/>(I)</b>       | N                                | 4.2±0.9         | 4.0±0.9                                            | 3.9±0.5                                            | 3.7±0.5                                            | 3.5±0.4                                            |
|                           | R (Å)                            | 1.97±0.01       | 1.98±0.04                                          | 1.98±0.04                                          | 2.00±0.06                                          | 1.98±0.04                                          |
|                           | σ <sup>2</sup> (Å <sup>2</sup> ) | 0.006±0.004     | 0.004                                              | 0.004                                              | 0.004                                              | 0.003                                              |
| <b>Zn-Zn<br/>(I)</b>      | N                                | 4.9±1.5         | 6.0±1.3                                            | 6.1±1.3                                            | 6.2±1.2                                            | 6.0±1.2                                            |
|                           | R (Å)                            | 3.14±0.02       | 3.31±0.12                                          | 3.3±0.11                                           | 3.34±0.15                                          | 3.32±0.13                                          |
|                           | σ <sup>2</sup> (Å <sup>2</sup> ) | 0.001           | 0.001                                              | 0.001                                              | 0.001                                              | 0.001                                              |
| <b>Zn-Zn<br/>(II)</b>     | N                                | 6.0±1.5         | 6.0±1.4                                            | 5.8±1.4                                            | 6.1±1.2                                            | 6.1±1.3                                            |
|                           | R (Å)                            | 3.29±0.02       | 3.16±0.01                                          | 3.16±0.008                                         | 3.19±0.04                                          | 3.17±0.02                                          |
|                           | σ <sup>2</sup> (Å <sup>2</sup> ) | 0.001           | 0.002                                              | 0.002                                              | 0.001                                              | 0.002                                              |
| <b>Zn-O<br/>(II)</b>      | N                                | 8.2±2.4         | 7.5±2.4                                            | 7.7±2.4                                            | 9.2±2.7                                            | 6.6±2.3                                            |
|                           | R (Å)                            | 3.78±0.03       | 3.81±0.07                                          | 3.80±0.06                                          | 3.86±0.12                                          | 3.82±0.08                                          |
|                           | σ <sup>2</sup> (Å <sup>2</sup> ) | 0.001           | 0.001                                              | 0.001                                              | 0.003                                              | 0.001                                              |
| <b>ε<sub>0</sub> (eV)</b> |                                  | 5.2             | 6.0                                                | 5.6                                                | 6.1                                                | 7.1                                                |
| <b>R-factor</b>           |                                  | 0.05            | 0.03                                               | 0.05                                               | 0.05                                               | 0.04                                               |

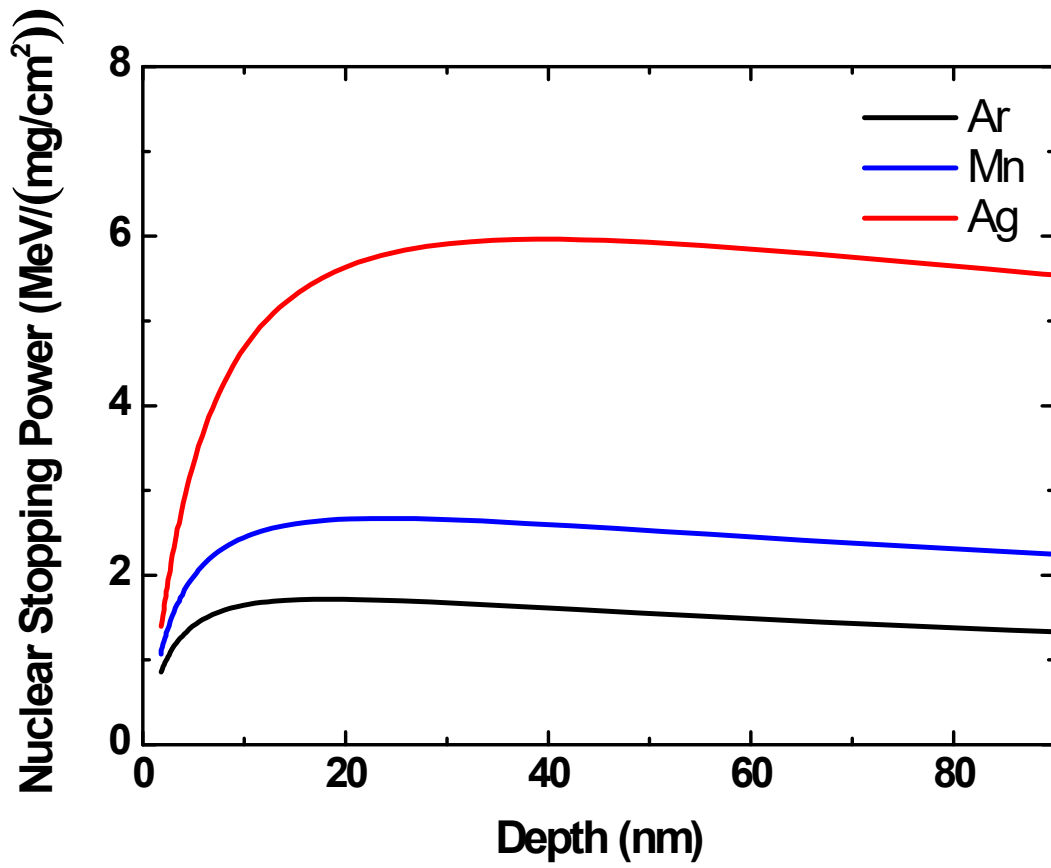

Figure S1: Energy transferred to the ZnO lattice during the implantation using Ar<sup>+</sup>, Mn<sup>+</sup> and Ag<sup>+</sup> ions.



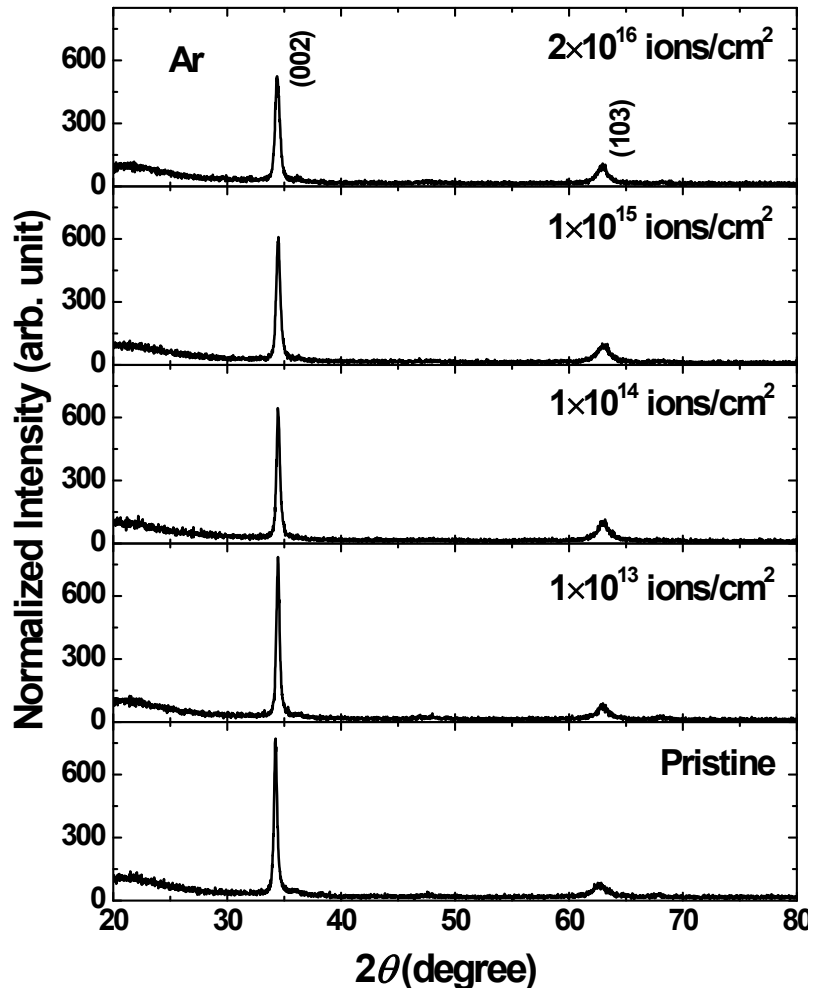

Figure S2: XRD patterns of the Ar<sup>+</sup> implanted ZnO at different doses.

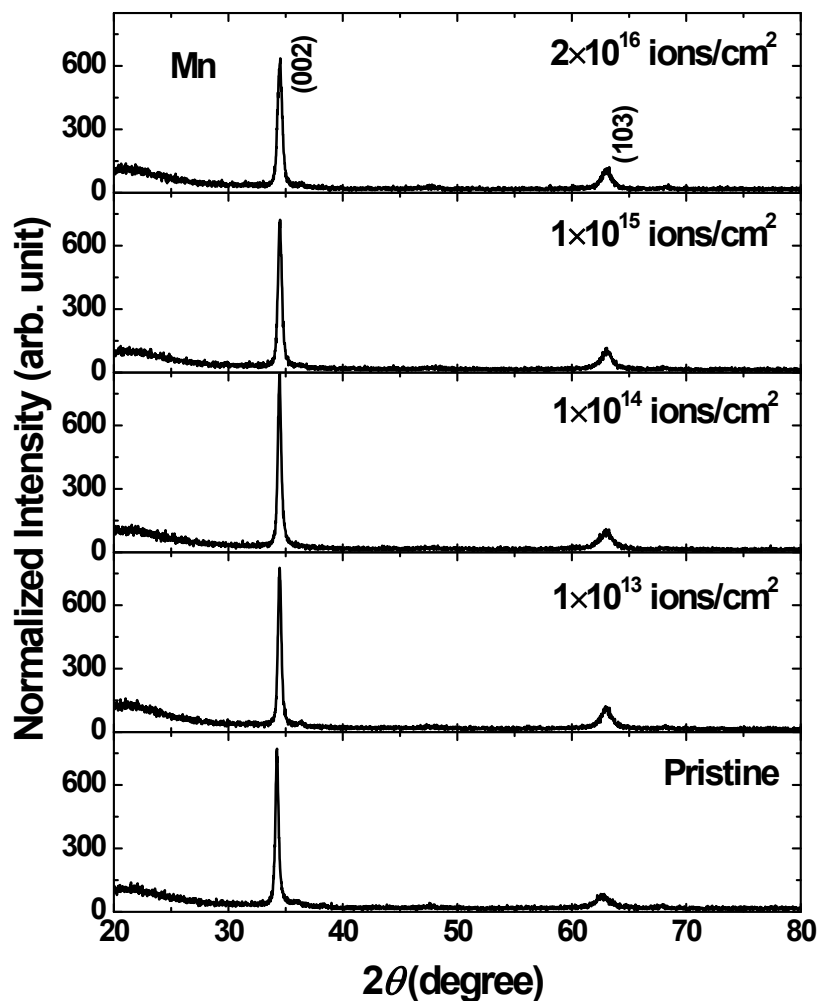

Figure S3: XRD patterns of the Mn<sup>+</sup> implanted ZnO at different doses.

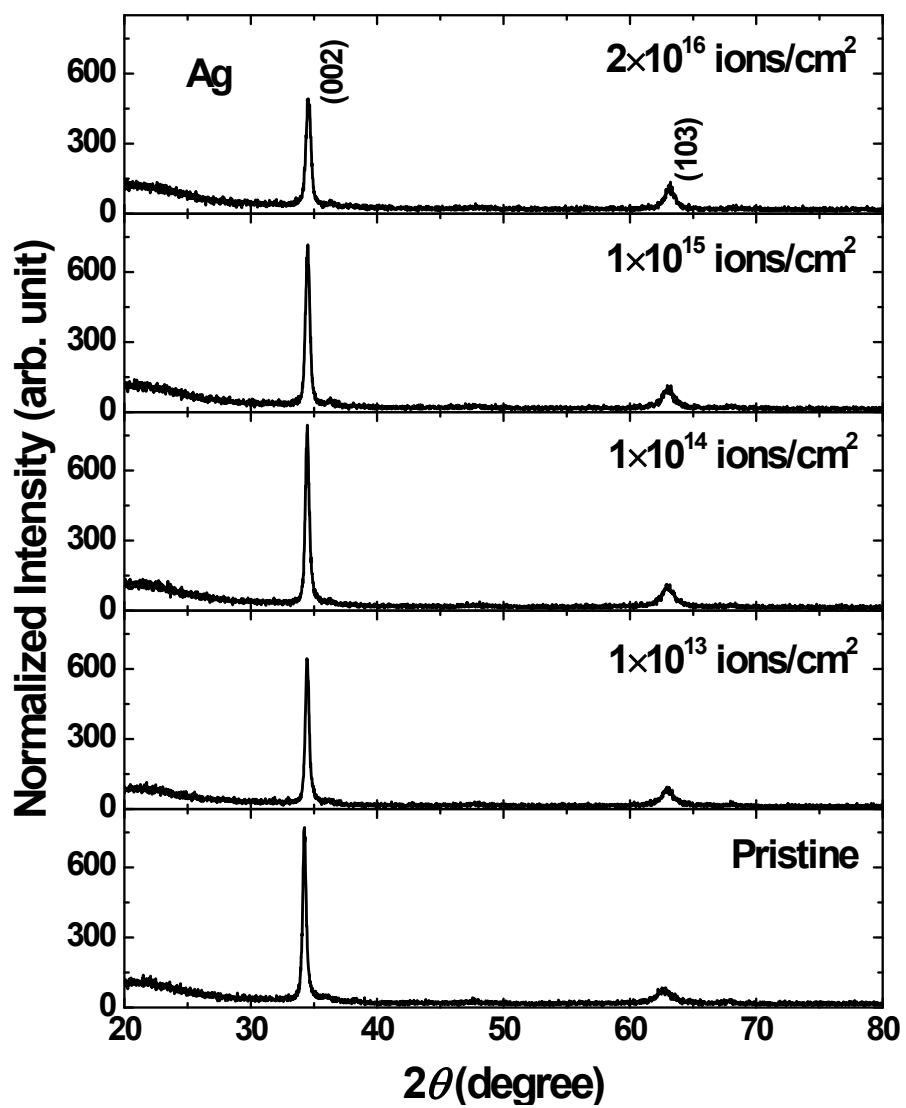

Figure S4: XRD patterns of the Ag<sup>+</sup> implanted ZnO at different doses.

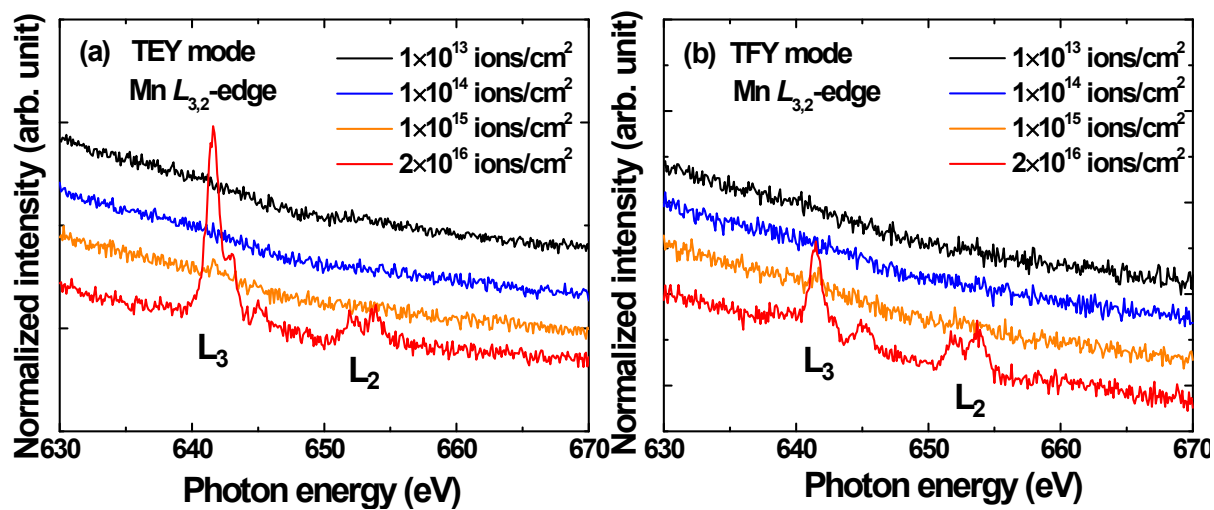

Figure S5: NEXAFS spectra at the Mn  $L_{3,2}$ -edge of Mn doped ZnO thin films. (a) TEY mode (b) TFY mode.

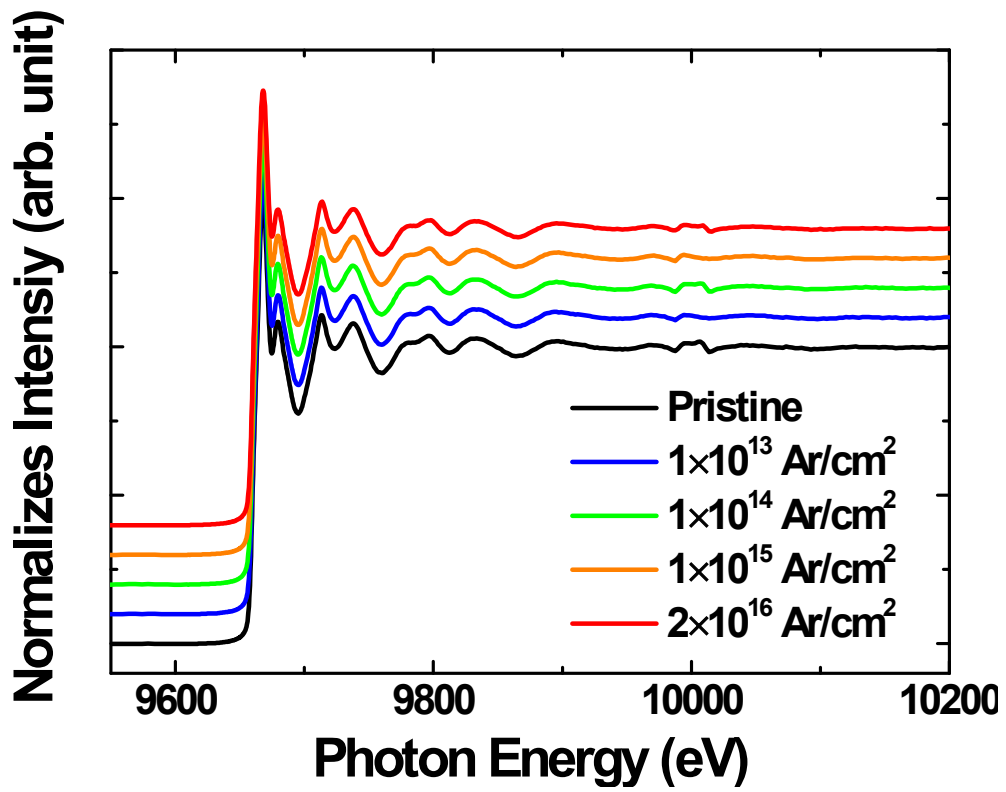

Figure S6: *k*-weight EXAFS spectra for Ar-implanted ZnO films at various doses.

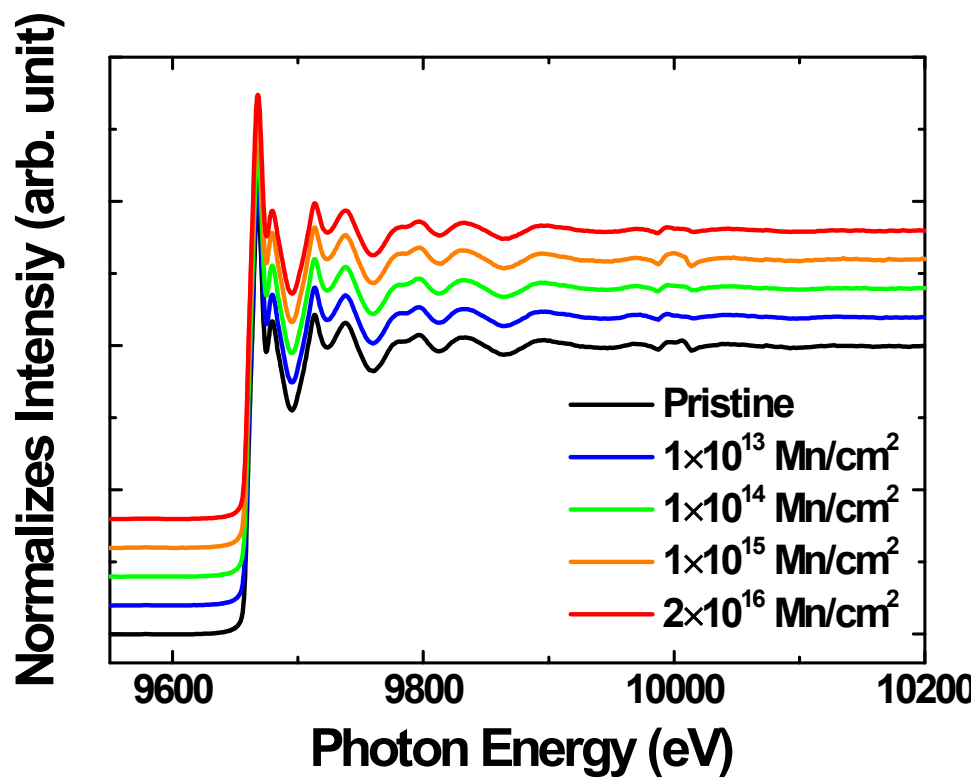

Figure S7: *k*-weight EXAFS spectra for Mn-implanted ZnO films at various doses.

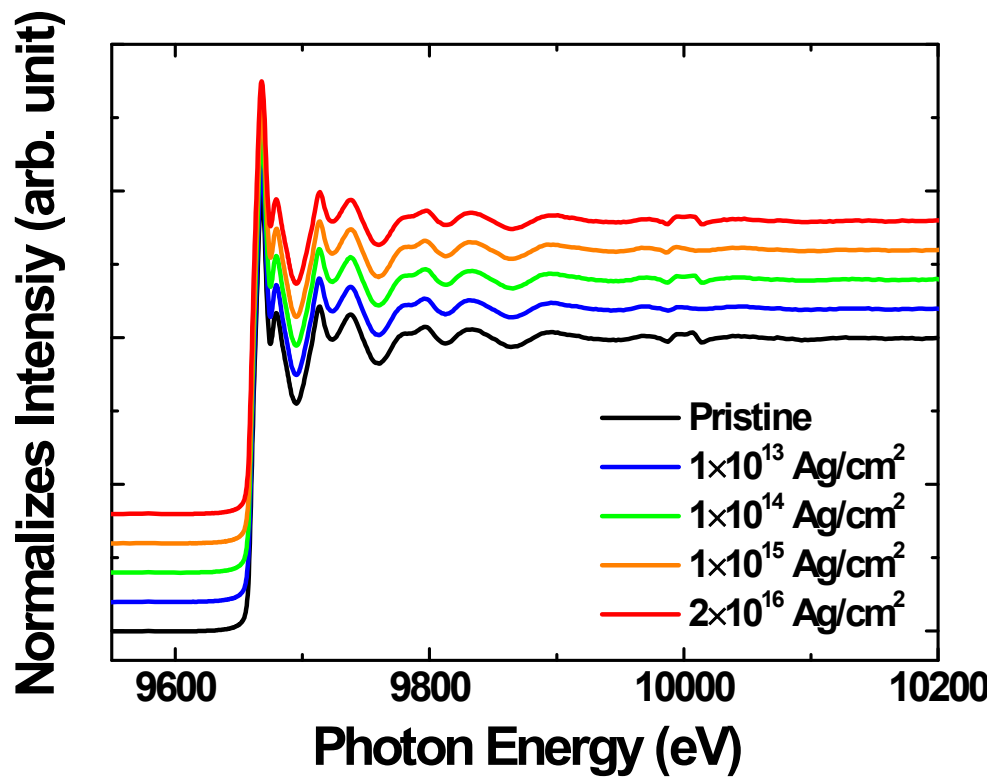

Figure S8: *k*-weight EXAFS spectra for Ag-implanted ZnO films at various doses.

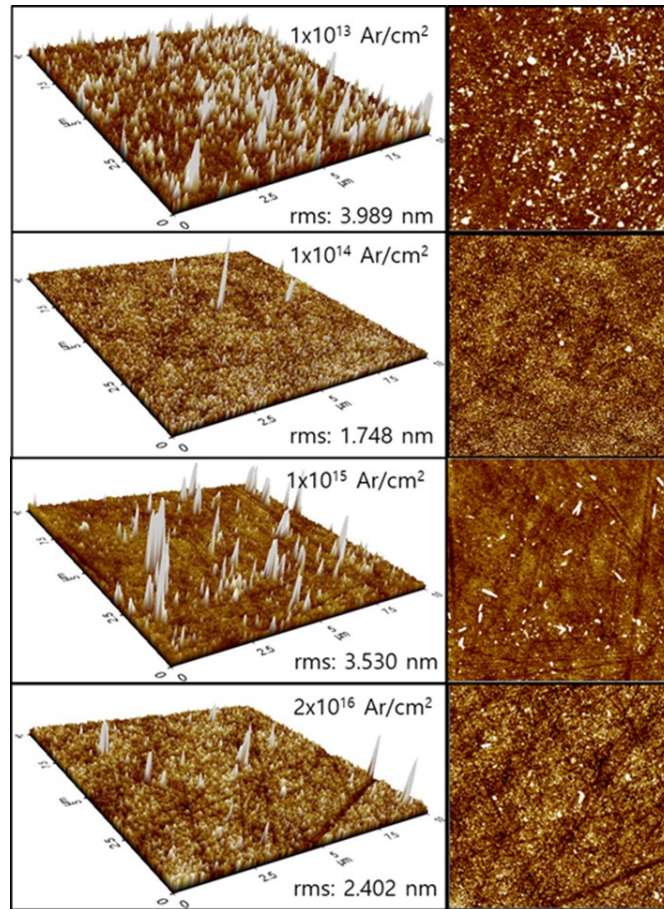

**Figure S9: AFM images of the Ar-implanted ZnO at different doses.**



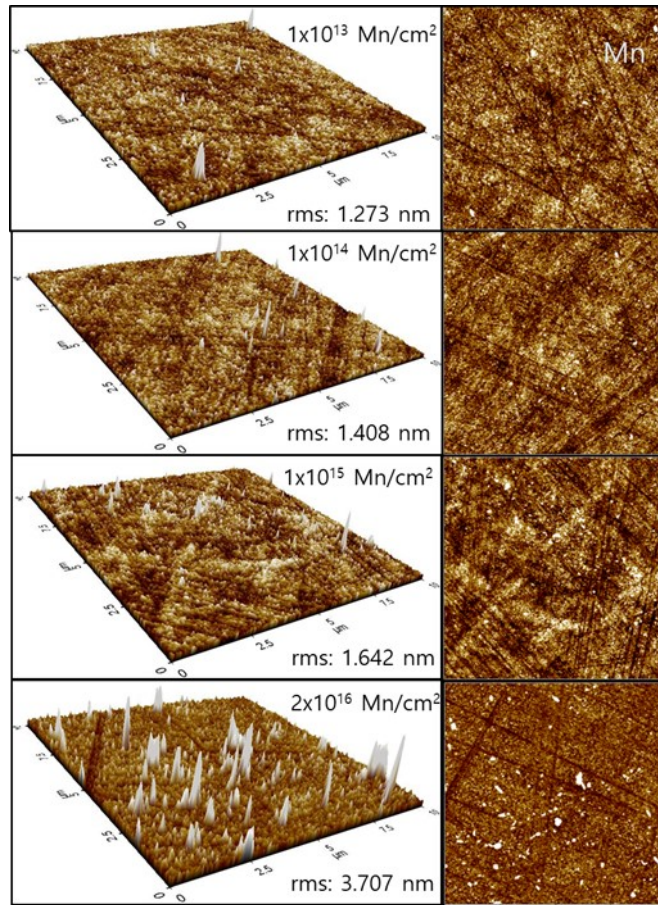

**Figure S10: AFM images of the Mn-implanted ZnO at different doses.**

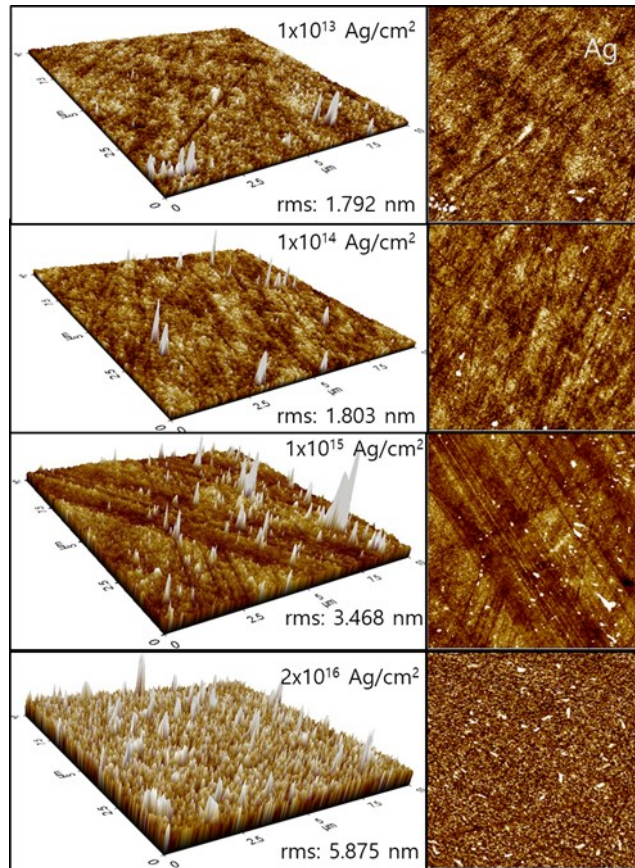

**Figure S11: AFM images of the Ag-implanted ZnO at different doses.**

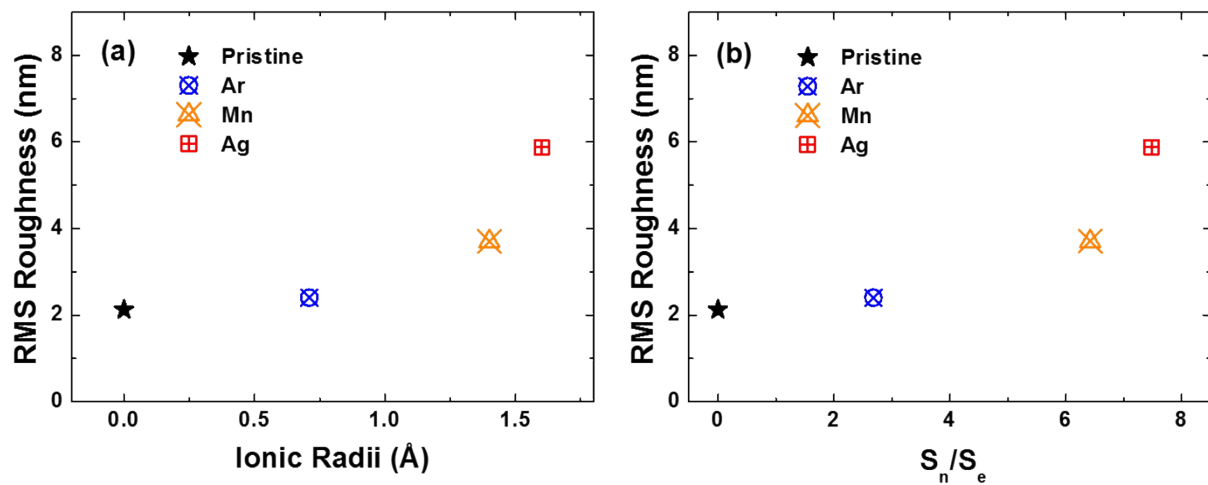

Figure S12: RMS roughness as a function of (a) ionic radii and (b)  $S_n/S_e$ .

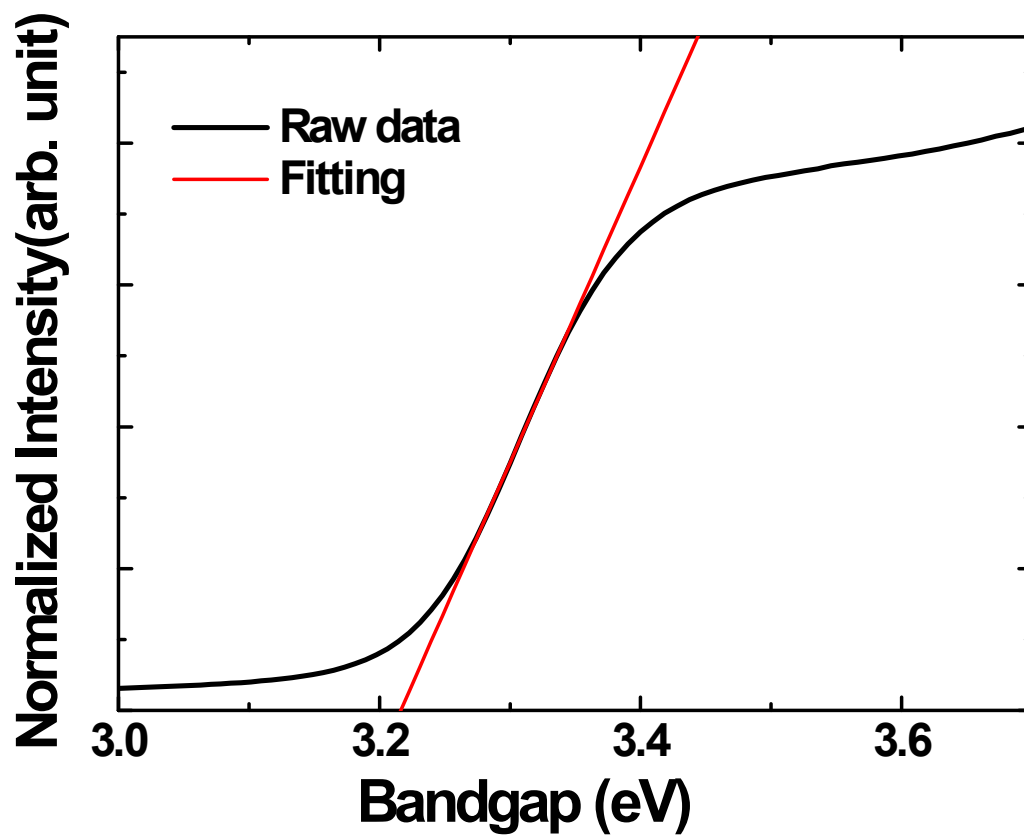

Figure S13: Estimation of optical bandgap from Tauc's plot for a representative film.

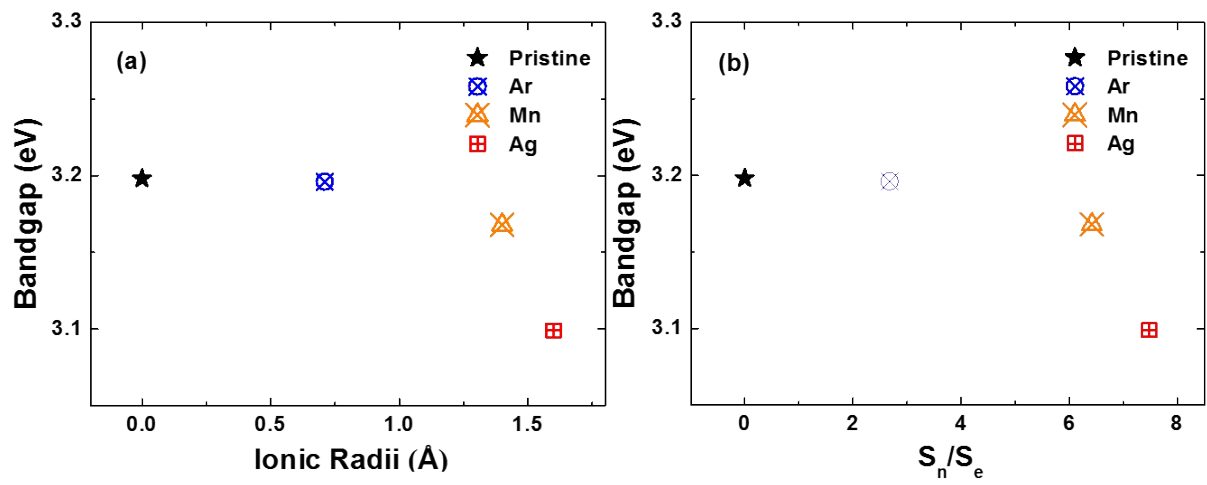

Figure S14: Optical band-gap as a function of (a) ionic radii and (b)  $S_n/S_e$  corresponding to various implanted ions.

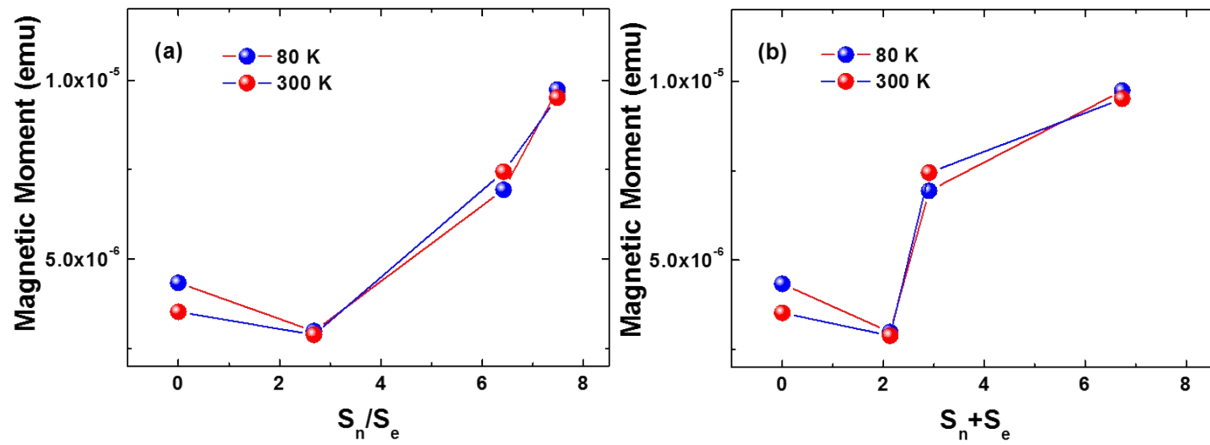

Figure S15: Magnetic moment as a function of (a) ionic radii and (b)  $S_n/S_e$  corresponding to various implanted ions.

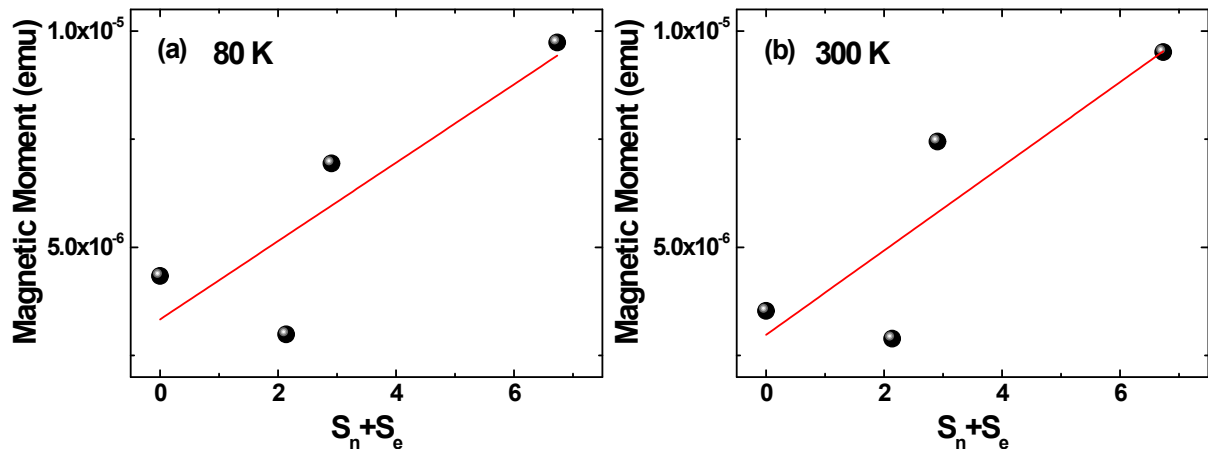

Figure S16: Magnetic moment as a function of  $S_n + S_e$  corresponding to various implanted ions at (a) 80 K and (b) 300 K.

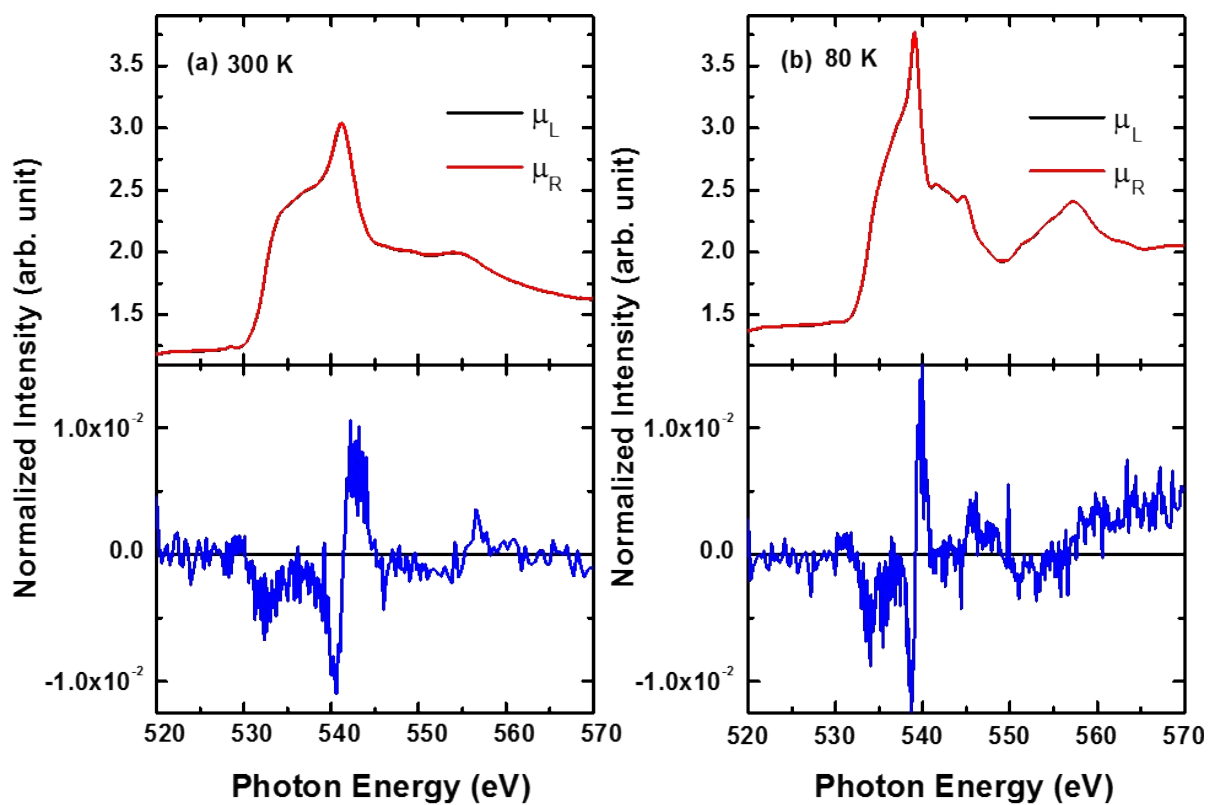

**Figure S17: O K-edge NEXAFS spectra under different helicity of light (upper panel) and XMCD signal (lower panel) measured at (a) 300 K and (b) 80 K for non-implanted ZnO film.**



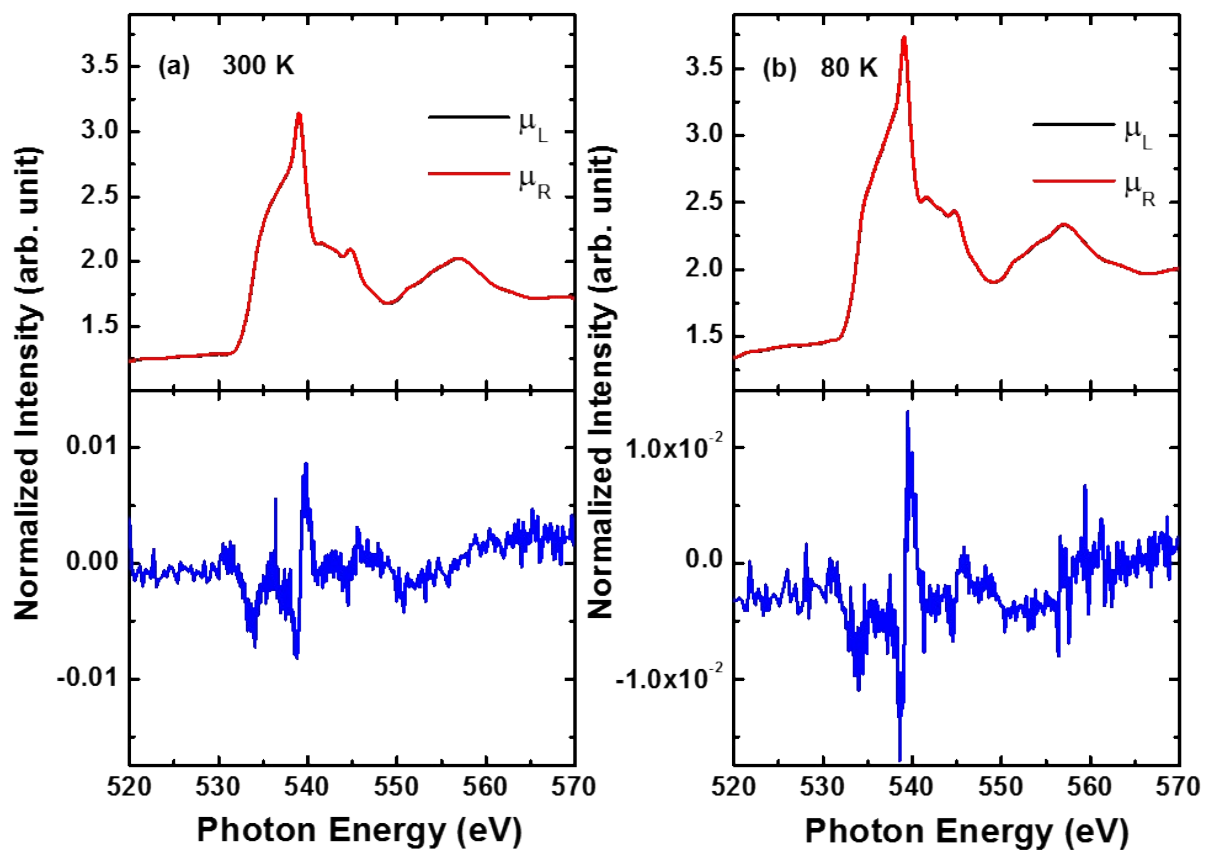

Figure S18: O K-edge NEXAFS spectra under different helicity of light (upper panel) and XMCD signal (lower panel) measured at (a) 300 K and (b) 80 K for Ar-implanted ZnO film.

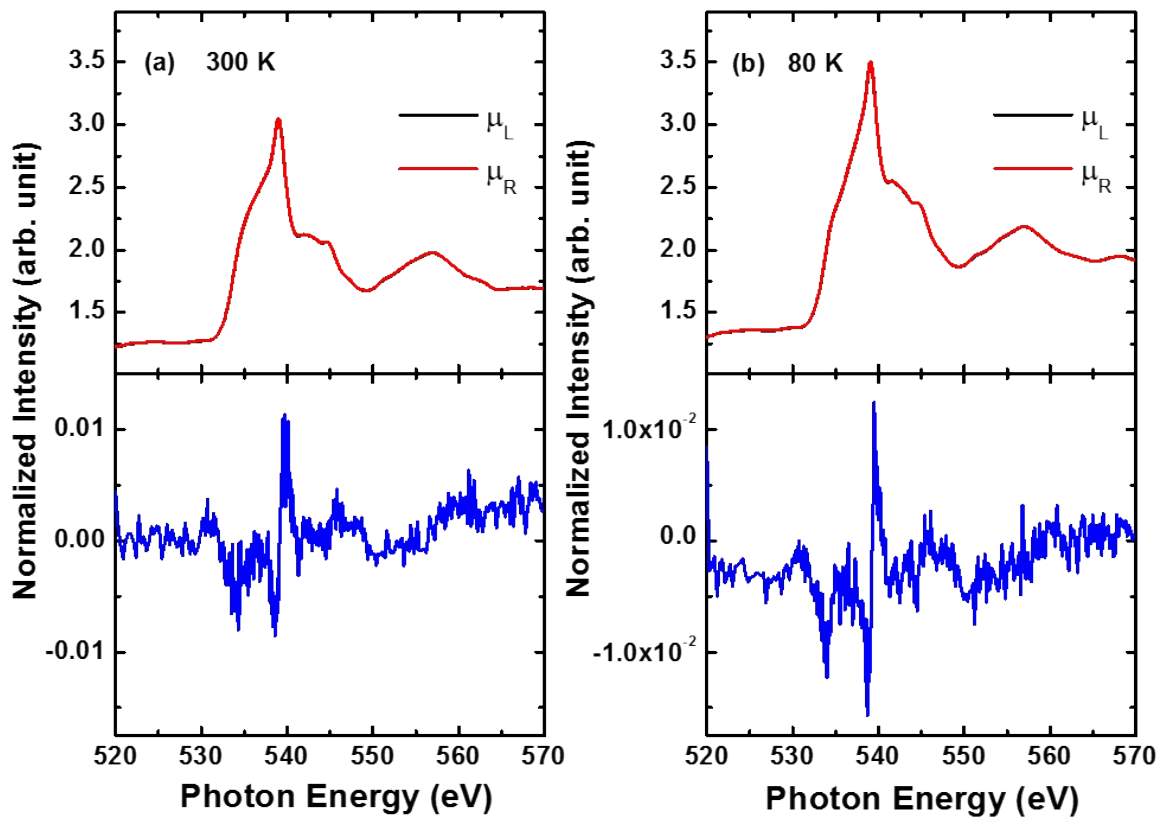

**Figure S19: O K-edge NEXAFS spectra under different helicity of light (upper panel) and XMCD signal (lower panel) measured at (a) 300 K and (b) 80 K for Mn-implanted ZnO film.**

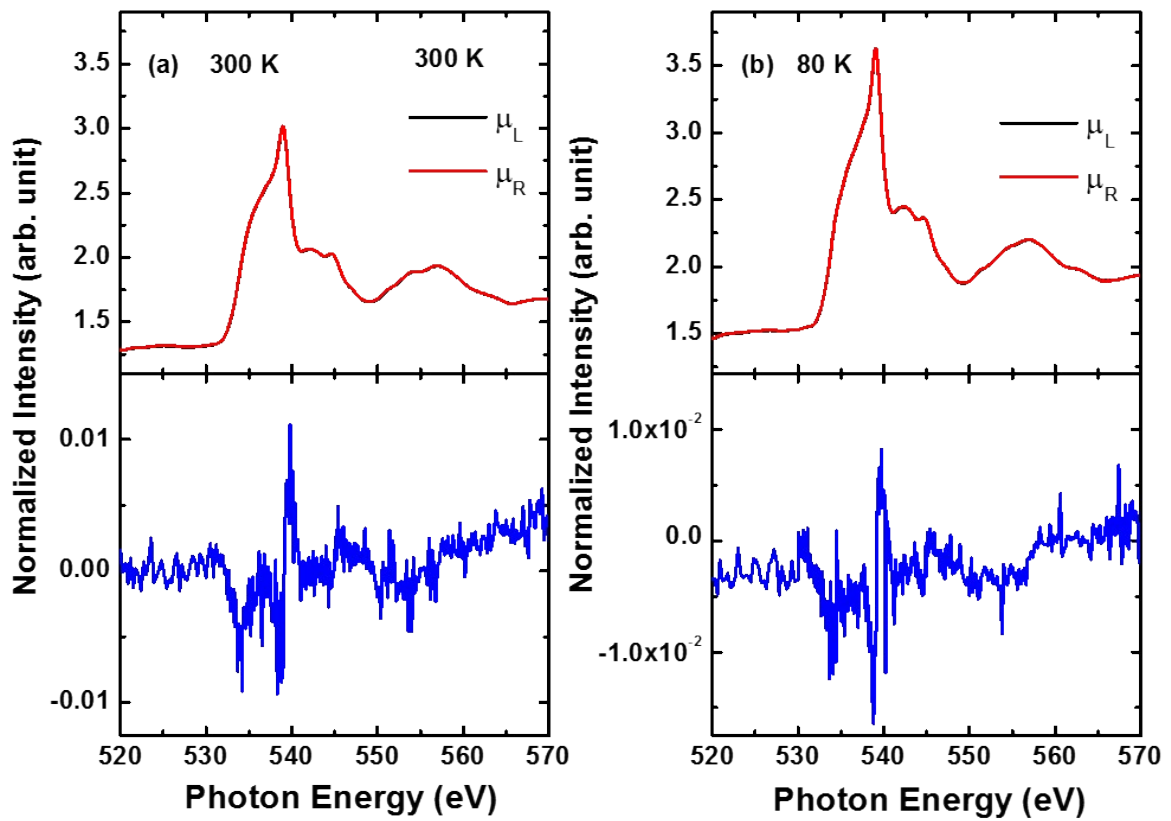

**Figure S20: O K-edge NEXAFS spectra under different helicity of light (upper panel) and XMCD signal (lower panel) measured at (a) 300 K and (b) 80 K for Ag-implanted ZnO film.**

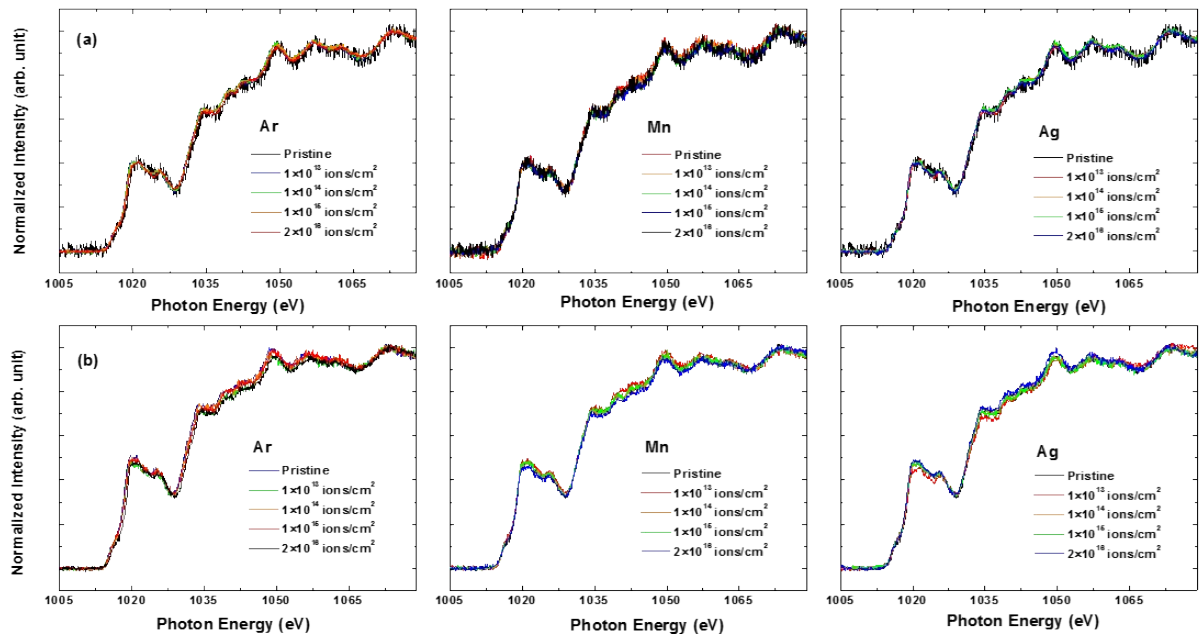

**Figure S21: Zn L-edge (a) TEY mode and (b) TFY mode NEXAFS spectra for the implanted ZnO films at various doses.**

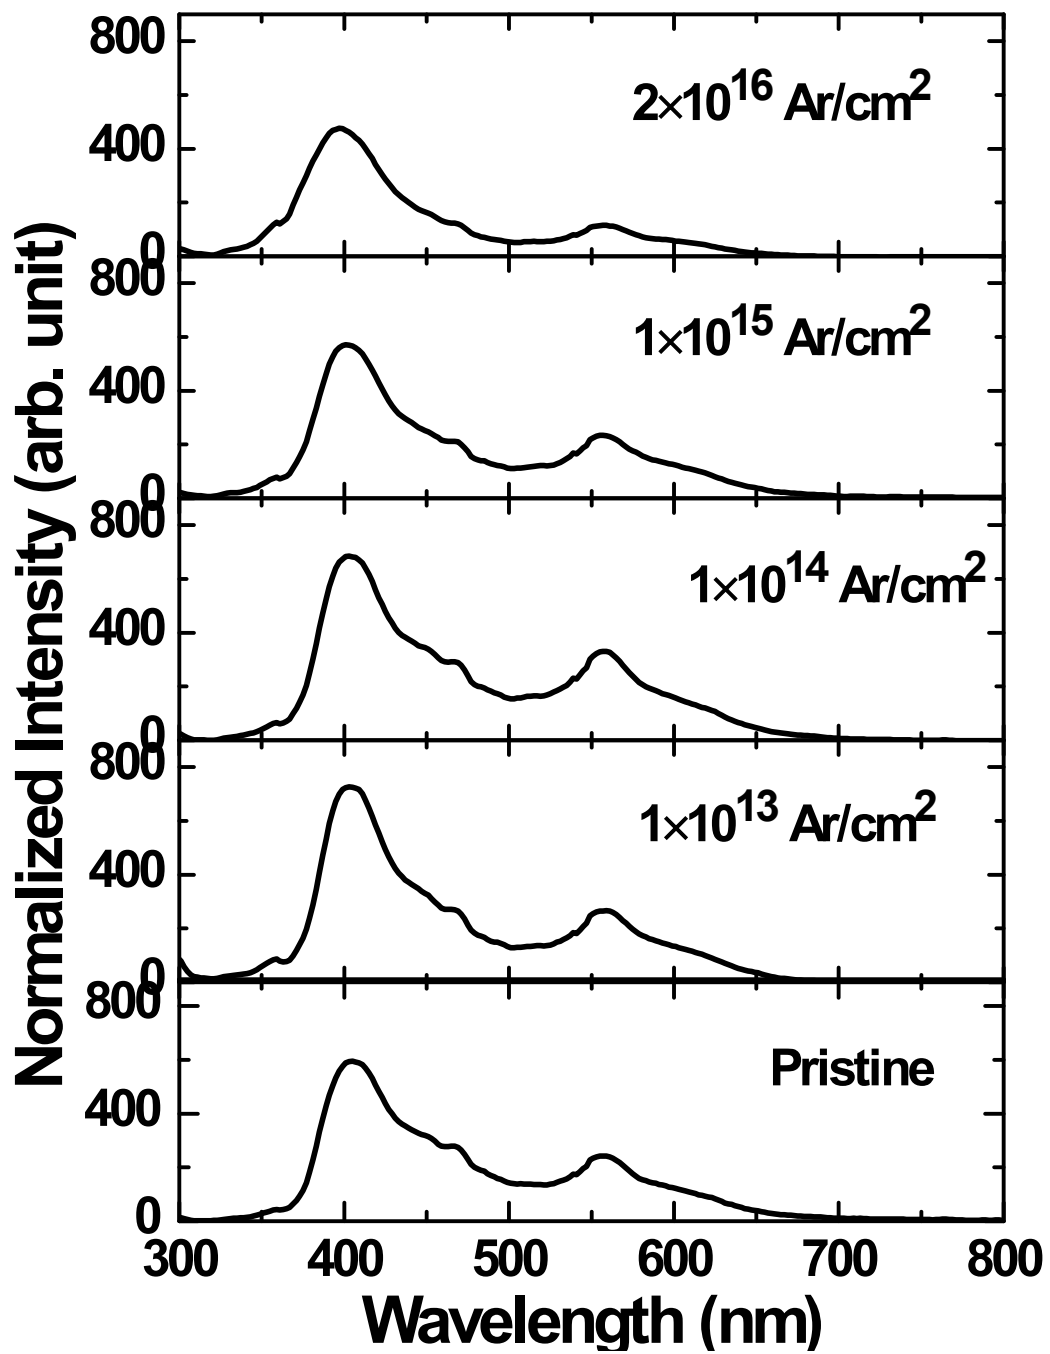

Figure S22: PL spectra of the Ar-implanted at various doses.

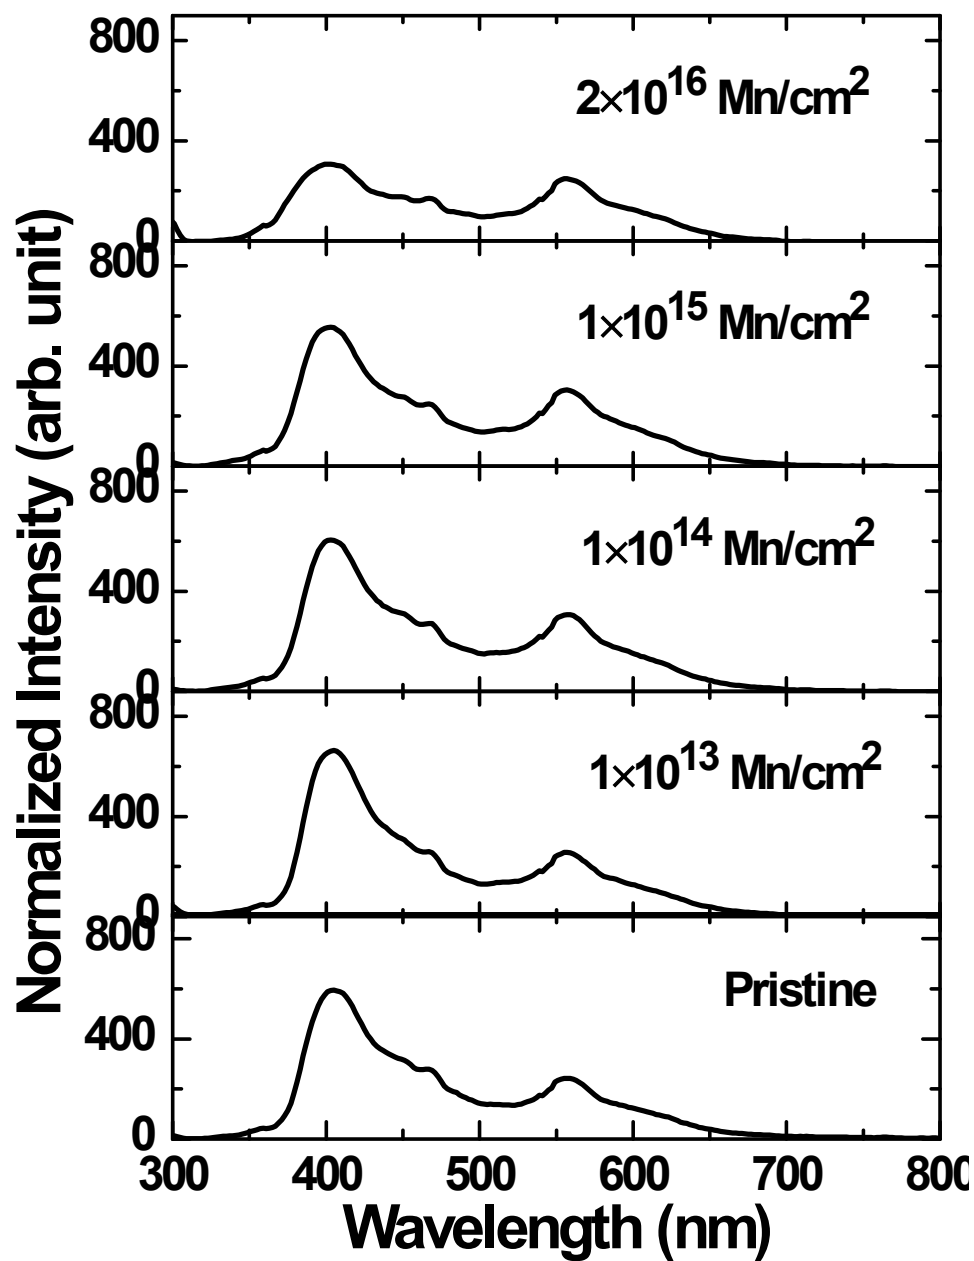

Figure S23: PL spectra of the Mn-implanted at various doses.

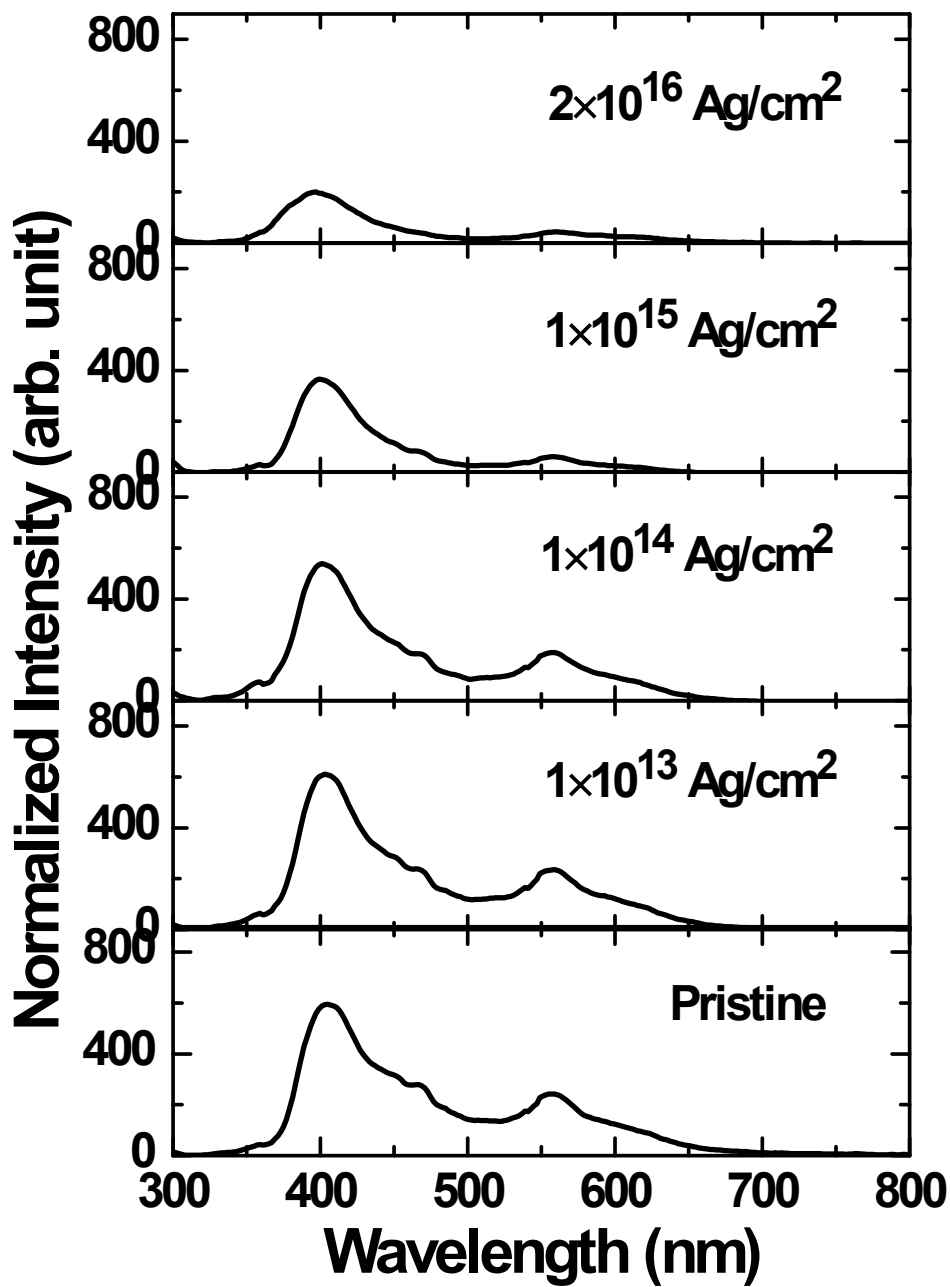

Figure S24: PL spectra of the Ag-implanted at various doses.

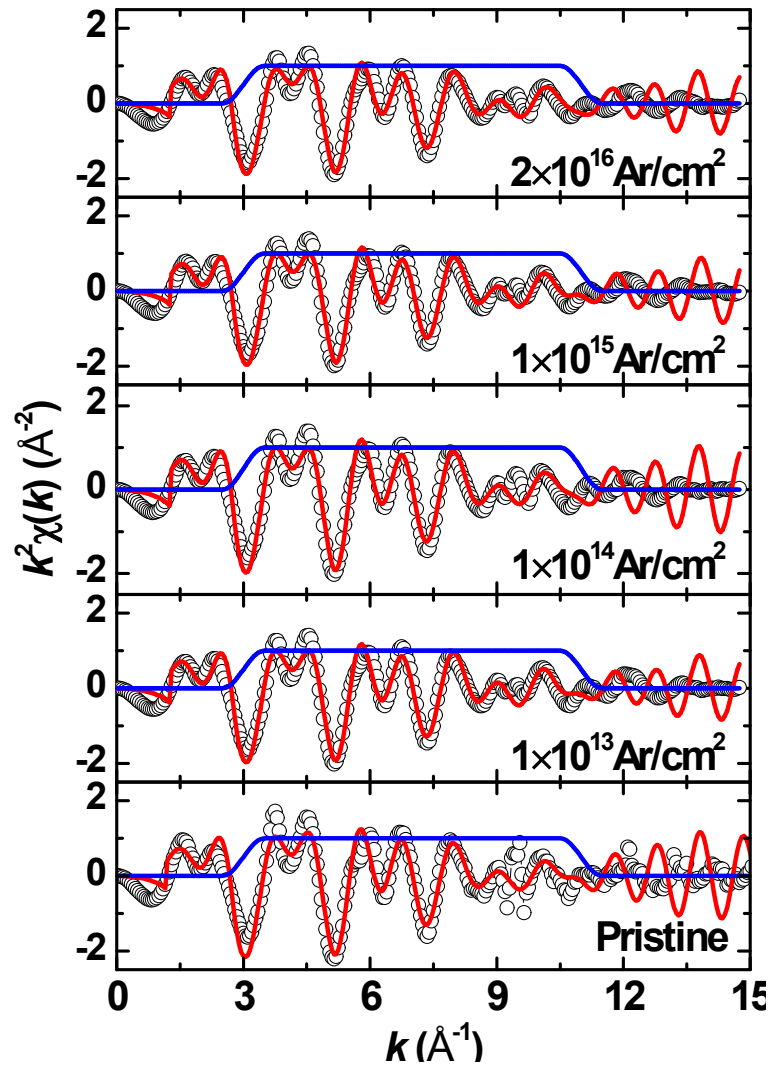

Figure 25: Simulated  $k$ -weight EXAFS spectra of Ar-implanted films at various doses.



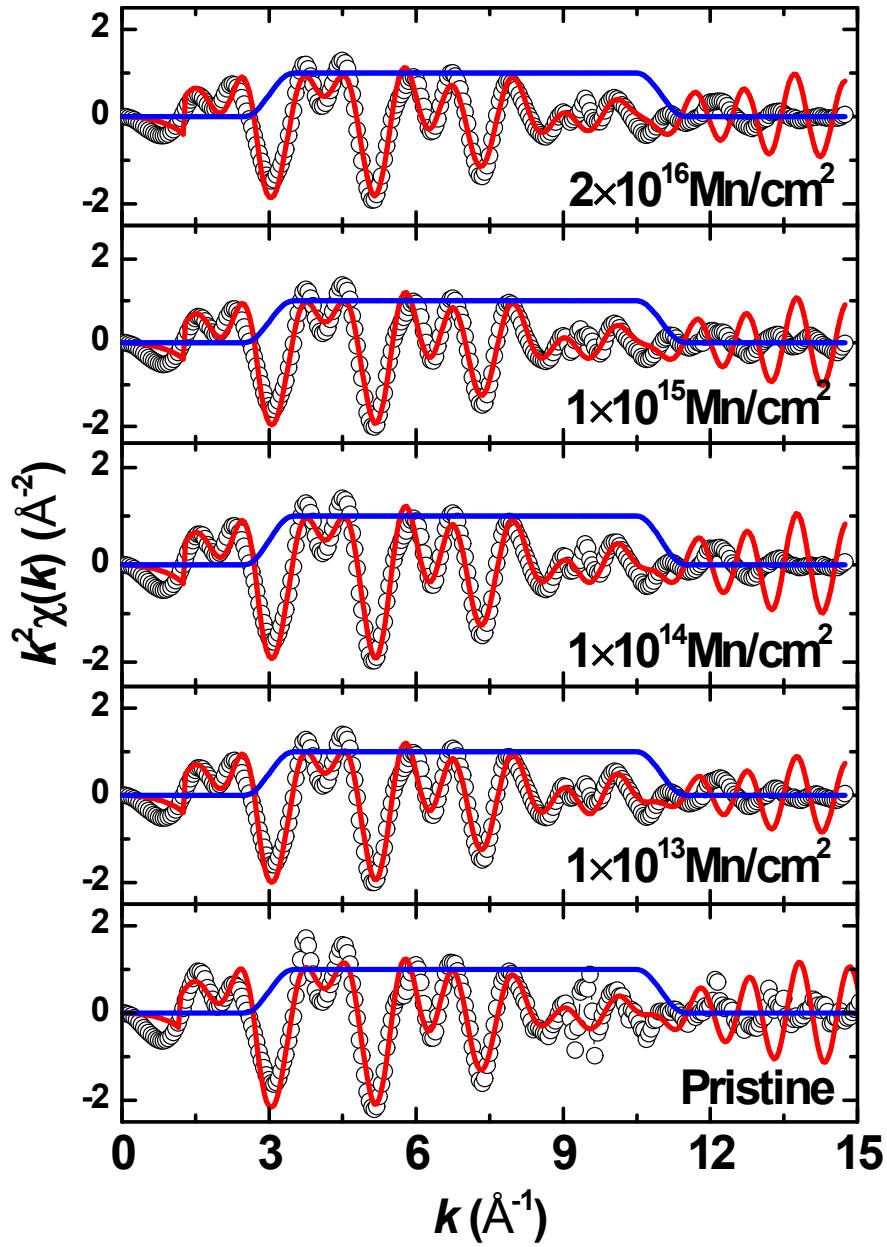

Figure 26: Simulated  $k$ -weight EXAFS spectra of Mn-implanted films at various doses.

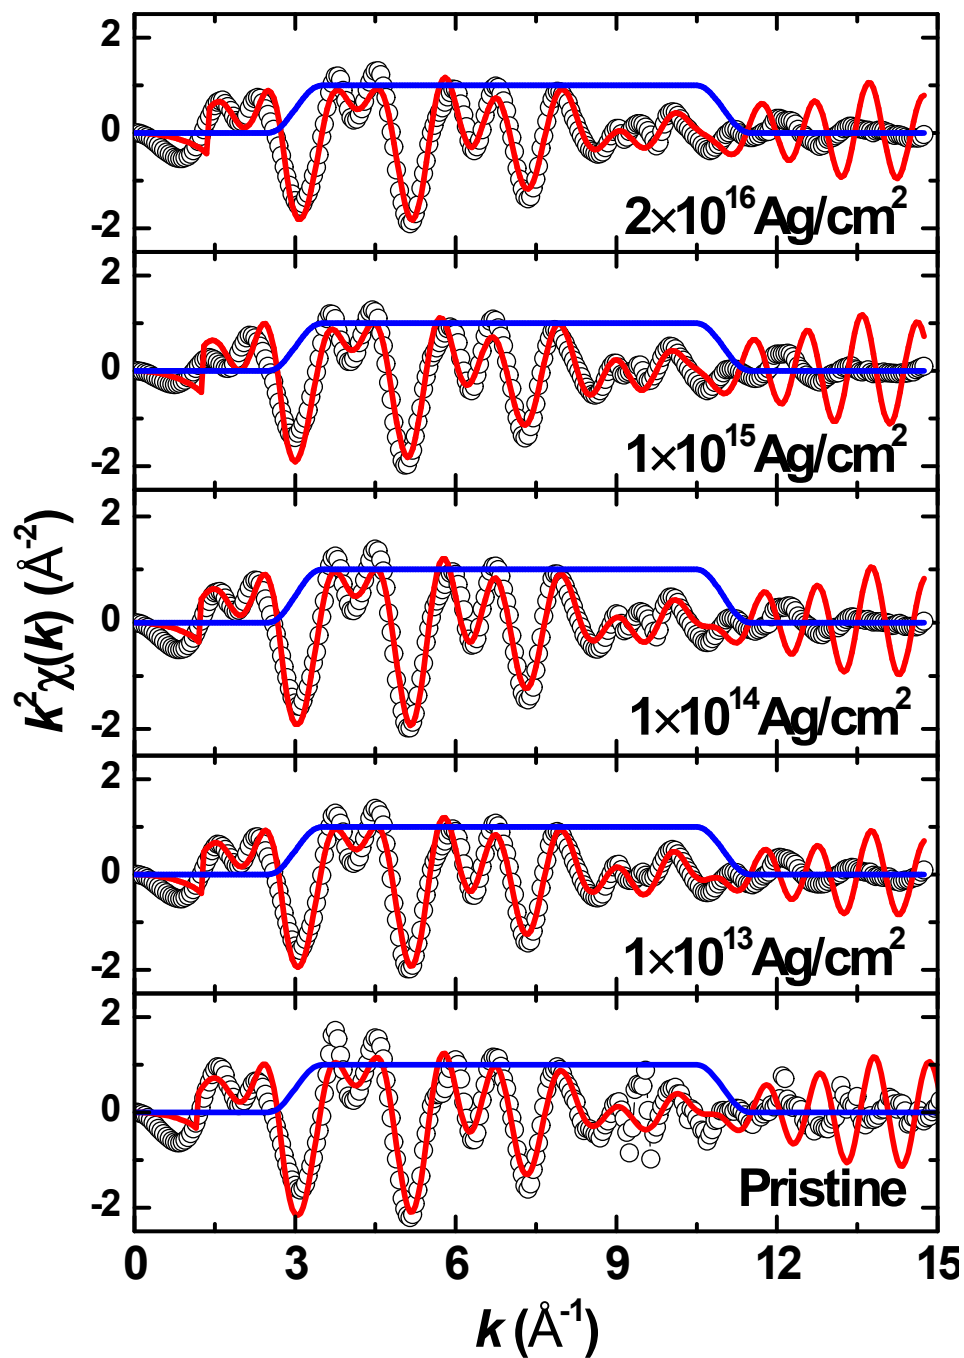

Figure 27: Simulated  $k$ -weight EXAFS spectra of Ag-implanted films at various doses.
